# Supplementary material for: Oxidative Stress-Induced Alterations of Cellular Localization and Expression of Aquaporin 1 Lead to Defected Water Transport upon Peritoneal Fibrosis
Source: MDPI journal article supplement (doi:10.3390/biomedicines10040810), 2022-03-30

**Original whole membrane of Western blotting detection in manuscripts.**

Whole PVDF membrane from all Western blotting analyses were presented. Target protein signal was indicated with corresponding molecular weight.

- The following were referred to western blot results in Figure 3

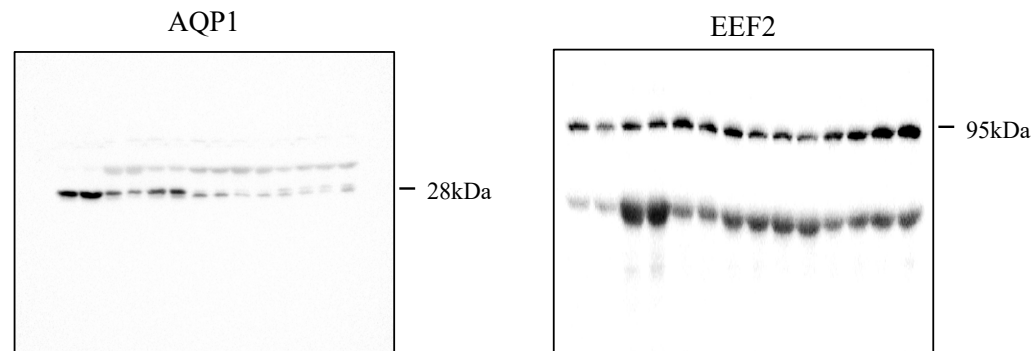

- The following were referred to western blot results in Figure 4

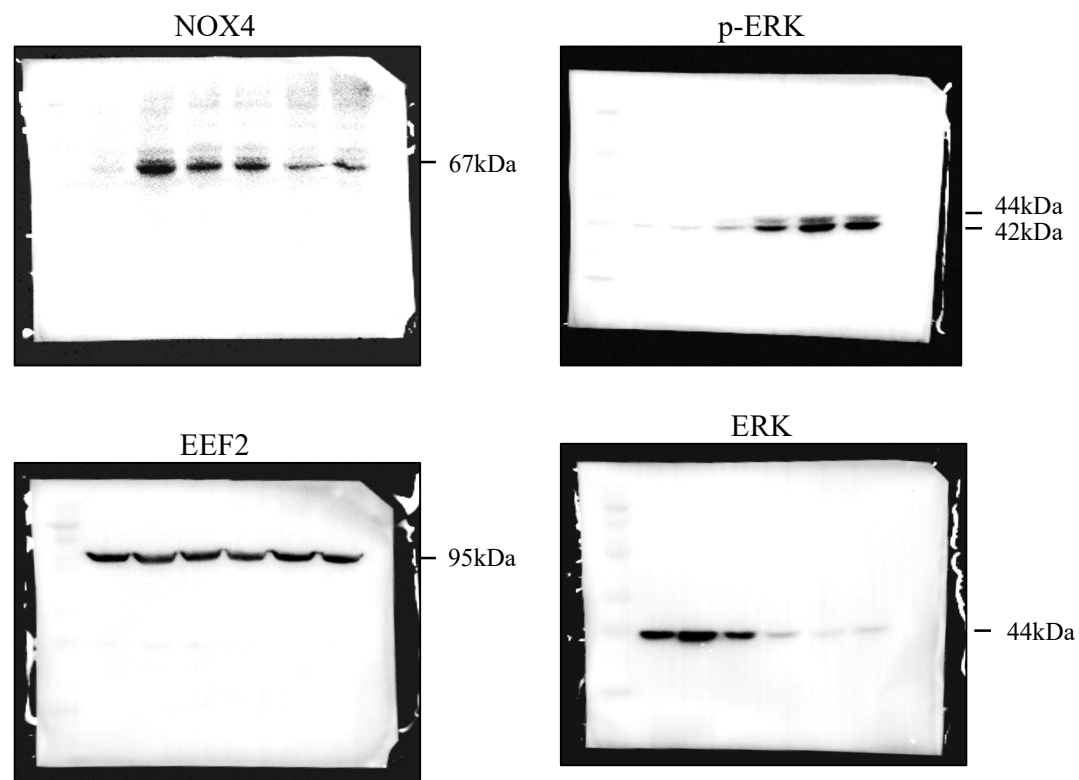

p-ERK

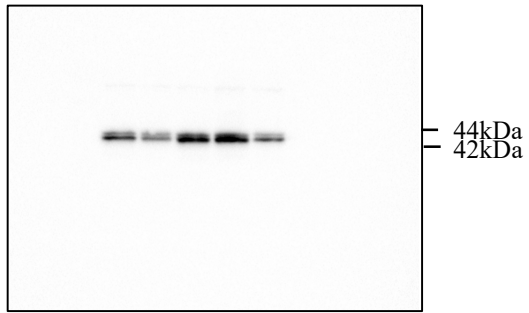

ERK

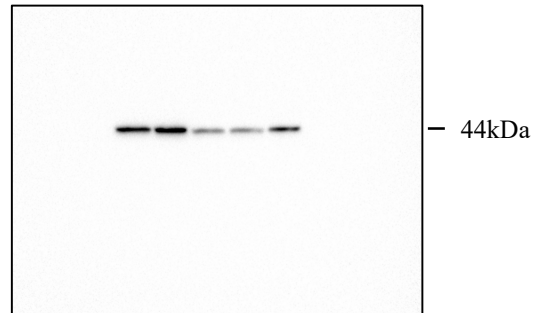

EEF2

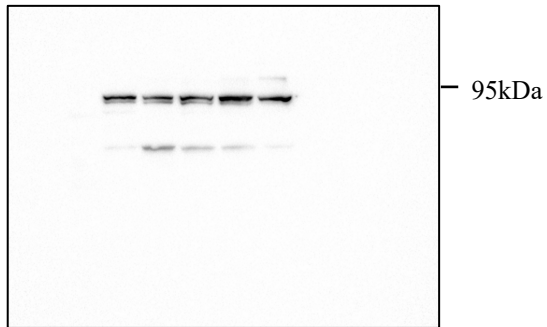

Supplement: s1 [file s1]
